# Supplementary material
Source: PubMed Central journal article supplement (PMC4183164)
Supplement: supp_2.3.E139_2013-0087_original_submission.pdf [file supp_2.3.E139_2013-0087_original_submission.pdf]

## Chronic Hepatitis C Associated Hospitalizations: A Birth Cohort Analysis with Implications for Screening

|                               |                                                                                                                                                                                                                                                                                                                                                                                                                                                                                                                                                                                                                                                                                                                                                                                                                                                                                                                                                                                                                                                                                                                                                                                                                                                                                                                                                                                                                                                                                                                                                                                                                                                                                                                                          |
|-------------------------------|------------------------------------------------------------------------------------------------------------------------------------------------------------------------------------------------------------------------------------------------------------------------------------------------------------------------------------------------------------------------------------------------------------------------------------------------------------------------------------------------------------------------------------------------------------------------------------------------------------------------------------------------------------------------------------------------------------------------------------------------------------------------------------------------------------------------------------------------------------------------------------------------------------------------------------------------------------------------------------------------------------------------------------------------------------------------------------------------------------------------------------------------------------------------------------------------------------------------------------------------------------------------------------------------------------------------------------------------------------------------------------------------------------------------------------------------------------------------------------------------------------------------------------------------------------------------------------------------------------------------------------------------------------------------------------------------------------------------------------------|
| Journal:                      | <i>CMAJ Open</i>                                                                                                                                                                                                                                                                                                                                                                                                                                                                                                                                                                                                                                                                                                                                                                                                                                                                                                                                                                                                                                                                                                                                                                                                                                                                                                                                                                                                                                                                                                                                                                                                                                                                                                                         |
| Manuscript ID:                | CMAJOpen-2013-0087                                                                                                                                                                                                                                                                                                                                                                                                                                                                                                                                                                                                                                                                                                                                                                                                                                                                                                                                                                                                                                                                                                                                                                                                                                                                                                                                                                                                                                                                                                                                                                                                                                                                                                                       |
| Manuscript Type:              | Other                                                                                                                                                                                                                                                                                                                                                                                                                                                                                                                                                                                                                                                                                                                                                                                                                                                                                                                                                                                                                                                                                                                                                                                                                                                                                                                                                                                                                                                                                                                                                                                                                                                                                                                                    |
| Date Submitted by the Author: | 05-Dec-2013                                                                                                                                                                                                                                                                                                                                                                                                                                                                                                                                                                                                                                                                                                                                                                                                                                                                                                                                                                                                                                                                                                                                                                                                                                                                                                                                                                                                                                                                                                                                                                                                                                                                                                                              |
| Complete List of Authors:     | Schanzer, Dena; Public Health Agency of Canada, Infectious Disease and Emergency Preparedness Branch<br>Paquette, Dana; Public Health Agency of Canada,<br>Lix, Lisa; University of Manitoba, Department of Community Health Sciences                                                                                                                                                                                                                                                                                                                                                                                                                                                                                                                                                                                                                                                                                                                                                                                                                                                                                                                                                                                                                                                                                                                                                                                                                                                                                                                                                                                                                                                                                                    |
| Keywords:                     | Epidemiology, Hepatology, Infectious diseases, Public health, Statistics and research methods                                                                                                                                                                                                                                                                                                                                                                                                                                                                                                                                                                                                                                                                                                                                                                                                                                                                                                                                                                                                                                                                                                                                                                                                                                                                                                                                                                                                                                                                                                                                                                                                                                            |
| More Detailed Keywords:       | Chronic hepatitis C, Birth cohort, Cohort effect, Hospitalization, Trends and projections, Disease burden                                                                                                                                                                                                                                                                                                                                                                                                                                                                                                                                                                                                                                                                                                                                                                                                                                                                                                                                                                                                                                                                                                                                                                                                                                                                                                                                                                                                                                                                                                                                                                                                                                |
| Abstract:                     | <p><b>Background:</b> Much of the recent increase in chronic hepatitis C (CHC) mortality and morbidity rates in Canada is believed to be due to higher CHC prevalence among the baby boom population. We aimed to assess the current and potential future CHC-associated hospitalization burden by birth cohort and compare the cohort-specific rates.</p> <p><b>Methods:</b> Hospital records of in-patients with a diagnosis of CHC and liver disease or liver cancer (CHC-LD) were extracted from the Canadian Discharge Abstract Database (DAD), for April 2004 to March 2011. Regression was used to estimate the temporal trend for each 5-year birth cohort from 1915 to 1984. These trends were used to predict future hospitalizations. Parametric bootstrap methods were used to calculate 95% confidence intervals (CIs) corresponding to the estimated rate ratios.</p> <p><b>Results:</b> CHC-LD associated hospitalizations increased an average of 6.0% (95% CI, 4.4%-7.7%) per year over the study period. The CHC-LD associated morbidity burden was highest for the 1950-54 and 1955-59 birth cohorts at 18 (95%CI, 13-24) and 14 (95%CI, 10.3-18.2) times the rate for the 1970-74 birth cohort in 2010 respectively. Comparing rates at 75 years of age, the anticipated rate ratios declined to 3.6 (95%CI, 2.3-4.9) and 3.4 (95%CI, 2.1-4.7). Rate ratios at age 75 were statistically elevated for the four 5-year birth cohorts from 1950-69.</p> <p><b>Conclusions:</b> Without further interventions, the CHC-LD disease burden will continue to increase for most birth cohorts, likely peaking after age 70. A significant disease burden is emerging in younger birth cohorts that should be monitored.</p> |
|                               |                                                                                                                                                                                                                                                                                                                                                                                                                                                                                                                                                                                                                                                                                                                                                                                                                                                                                                                                                                                                                                                                                                                                                                                                                                                                                                                                                                                                                                                                                                                                                                                                                                                                                                                                          |

1  
2  
3  
4  
5  
6  
7  
8  
9  
10  
11  
12  
13  
14  
15  
16  
17  
18  
19  
20  
21  
22  
23  
24  
25  
26  
27  
28  
29  
30  
31  
32  
33  
34  
35  
36  
37  
38  
39  
40  
41  
42  
43  
44  
45  
46  
47  
48  
49  
50  
51  
52  
53  
54  
55  
56  
57  
58  
59  
60

SCHOLARONE™  
Manuscripts

Confidential

1  
2  
3  
4  
5  
6  
7 1 **Title:** Chronic Hepatitis C Associated Hospitalizations: A Birth Cohort Analysis with  
8  
9 2 Implications for Screening  
10  
11  
12  
13 3

14  
15  
16 4 Authors:

17  
18  
19 5 Dena L. Schanzer<sup>1</sup>, Dana Paquette<sup>1</sup>, Lisa M. Lix<sup>2</sup>  
20  
21  
22  
23 6

24  
25  
26 7 Author Affiliations:

27  
28  
29 8 <sup>1</sup> Infectious Disease Prevention and Control Branch, Public Health Agency of Canada,  
30  
31  
32 9 Ottawa, Ontario, Canada  
33  
34

35 10 <sup>2</sup> Department of Community Health Sciences, University of Manitoba, Manitoba, Canada  
36  
37  
38  
39 11  
40  
41  
42  
43  
44  
45  
46  
47  
48  
49  
50  
51  
52  
53  
54  
55  
56  
57  
58  
59  
60

13 Corresponding author:

14 Dena Schanzer, Infectious Disease and Emergency Preparedness Branch, Public  
15 Health Agency of Canada, 100 Eglantine Driveway, Tunney's Pasture, AL:0603B,  
16 Ottawa, Ontario, K1A 0K9, Canada

17 e-mail: dena.schanzer@phac-aspc.gc.ca

1  
2  
3  
4  
5  
6  
7  
8  
9  
10  
11  
12  
13  
14  
15  
16  
17  
18  
19  
20  
21  
22  
23  
24  
25  
26  
27  
28  
29  
30  
31  
32  
33  
34  
35  
36  
37  
38  
39  
40  
41  
42  
43  
44  
45  
46  
47  
48  
49  
50  
51  
52  
53  
54  
55  
56  
57  
58  
59  
60

18

19 **Short Title:** Chronic HCV Disease Burden by Birth Cohort

20

21 **Word count:** Abstract: 249 Text: 2483

22 Number of Tables: 3

23 Number of Figures: 3

24

Confidential

1  
2  
3  
4  
5  
6  
7 25 **Potential conflicts of interest**  
8

9  
10 26 None declared.  
11

12  
13 27 **Financial support**  
14

15  
16  
17 28 Third party funding was not sought for this study. LML is supported by a Research Chair  
18  
19 29 from the Manitoba Health Research Council.  
20

21  
22  
23 30  
24

25  
26 31  
27  
28  
29  
30  
31  
32  
33  
34  
35  
36  
37  
38  
39  
40  
41  
42  
43  
44  
45  
46  
47  
48  
49  
50  
51  
52  
53  
54  
55  
56  
57  
58  
59  
60

Confidential

1  
2  
3  
4  
5  
6  
7 **32 Abstract**  
8  
9

10 **33 Background:** Much of the recent increase in chronic hepatitis C (CHC) mortality and  
11 morbidity rates in Canada is believed to be due to higher CHC prevalence among the baby  
12 boom population. We aimed to assess the current and potential future CHC-associated  
13 hospitalization burden by birth cohort and compare the cohort-specific rates.  
14  
15  
16  
17  
18

19  
20  
21 **37 Methods:** Hospital records of in-patients with a diagnosis of CHC and liver disease or  
22 liver cancer (CHC-LD) were extracted from the Canadian Discharge Abstract Database  
23 (DAD), for April 2004 to March 2011. Regression was used to estimate the temporal  
24 trend for each 5-year birth cohort from 1915 to 1984. These trends were used to predict  
25 future hospitalizations. Parametric bootstrap methods were used to calculate 95%  
26 confidence intervals (CIs) corresponding to the estimated rate ratios.  
27  
28  
29  
30  
31  
32  
33  
34  
35

36 **43 Results:** CHC-LD associated hospitalizations increased an average of 6.0% (95% CI,  
37 4.4%-7.7%) per year over the study period. The CHC-LD associated morbidity burden was  
38 highest for the 1950-54 and 1955-59 birth cohorts at 18 (95%CI, 13-24) and 14 (95%CI,  
39 10.3-18.2) times the rate for the 1970-74 birth cohort in 2010 respectively. Comparing  
40 rates at 75 years of age, the anticipated rate ratios declined to 3.6 (95%CI, 2.3-4.9) and 3.4  
41 (95%CI, 2.1-4.7). Rate ratios at age 75 were statistically elevated for the four 5-year birth  
42 cohorts from 1950-69.  
43  
44  
45  
46  
47  
48  
49  
50  
51  
52  
53  
54  
55  
56  
57  
58  
59  
60

1  
2  
3  
4  
5  
6  
7 50 **Conclusions:** Without further interventions, the CHC-LD disease burden will continue to  
8  
9 51 increase for most birth cohorts, likely peaking after age 70. A significant disease burden is  
10  
11 52 emerging in younger birth cohorts that should be monitored.  
12  
13  
14  
15 53

16  
17  
18 54 **Keywords:** Epidemiology; Hepatology; Infectious Diseases; Public Health; Statistics and  
19  
20  
21 55 research methods  
22

23  
24 56 **Detailed Keywords:** Birth Cohort; Chronic Hepatitis C; Cohort effect; Disease burden;  
25  
26  
27 57 Hospitalization; Trends and projections  
28

29  
30 58  
31  
32  
33  
34  
35  
36  
37  
38  
39  
40  
41  
42  
43  
44  
45  
46  
47  
48  
49  
50  
51  
52  
53  
54  
55  
56  
57  
58  
59  
60

## 59 Introduction

60 In August 2012, the US Center for Disease Control (US CDC) released recommendations  
61 to expand screening for the hepatitis C virus (HCV) to include a one-time blood test for all  
62 persons born between 1945 and 1965 (i.e., baby boom generation). This recommendation  
63 was based in part on estimates that this cohort accounts for three quarters of all HCV  
64 infections in the United States[1] and that of an estimated 4.3% of the population born in  
65 the 1950s who were infected[2], 50% were unaware of their HCV status[3]. Currently in  
66 Canada, screening recommendations for hepatitis C are based on an individual assessment  
67 of risk rather than the patient's age or year of birth[4]. The Canadian Health Measures  
68 Survey, a nationally representative household survey, estimated the seroprevalence for  
69 hepatitis C (HCV) in 2007 to 2011 at 0.5% (95%CI 0.3-0.9). However, only 30% (95% CI  
70 16-51) were aware of their infection status, and prevalence was elevated among persons  
71 aged 50-79 years compared to persons aged 14-49[5].

72 Chronic hepatitis C (CHC) infections have resulted in a considerable morbidity and  
73 mortality burden in Canada[6-8]. Using health-adjusted life-years (HALY), a composite  
74 measure of premature mortality and reduced functioning due to disease, to estimate the  
75 disease burden associated with 51 infectious diseases in Ontario, Kwong and colleagues[9]  
76 found that HCV was the infectious agent that accounted for the largest proportion of the  
77 disease burden, surpassing HIV. Linking diagnostic and mortality data, a study in British  
78 Columbia found significantly elevated standardized mortality ratios (SMR) for both liver



1  
2  
3  
4  
5  
6  
7 79 related and drug related causes of death as well as all-cause mortality among persons who  
8  
9 80 had tested positive for HCV compared to those who had tested negative for HCV[10].  
10

11  
12 81 The natural history of HCV is only partially understood, and the progression to liver  
13  
14 82 cirrhosis is variable[11-13]. A small portion of persons clear their infection. For others,  
15  
16 83 symptoms of the chronic infection often emerge 20 or more years after the initial infection.  
17  
18 84 Disease progression from fibrosis to cirrhosis and hepatocellular carcinoma is not linear in  
19  
20 85 time, with the rate of progression related to many factors, including time since infection,  
21  
22 86 age and alcohol consumption.  
23  
24  
25  
26

27  
28 87 This long delay from HCV infection to symptoms suggests that cohort-specific differences  
29  
30 88 in CHC prevalence as well as the aging of these cohorts significantly influenced the  
31  
32 89 observed trends in morbidity and mortality rates[6]. With access to detailed hospitalization  
33  
34 90 data, we aimed to explore the effect of birth-cohort on the trends in hospitalizations  
35  
36 91 associated with CHC and liver disease (CHC-LD); predict the future lifetime  
37  
38 92 hospitalizations by 5-year birth cohort; and compare the disease burden for different birth  
39  
40 93 cohorts.  
41  
42  
43  
44

45 94  
46  
47  
48  
49  
50  
51  
52  
53  
54  
55  
56  
57  
58  
59  
60

1  
2  
3  
4  
5  
6  
7 95 **Methods**  
8  
9

10 96 Sources of data:  
11

12  
13 97 Hospital discharge records for patients admitted to an acute care hospital with a diagnostic  
14  
15 98 code of CHC were extracted from the Canadian Institute of Health Information (CIHI)  
16  
17 99 patient-specific Discharge Abstract Database (DAD)[8] from April 2004 to March 2011, a  
18  
19  
20 100 period when all DAD participating provinces used the *International Classification of*  
21  
22 101 *Disease, Tenth Modification (ICD-10)*[14], Canadian version (ICD-10-CA)[15] for  
23  
24  
25 102 diagnostic coding. The province of Quebec does not participate in the DAD, hence the  
26  
27 103 DAD includes approximately 75% of all acute care hospital separations in Canada.  
28  
29 104 Hospitalizations were stratified by 5-year birth cohorts from 1915 to 1984, year of  
30  
31 105 discharge (batch year: running from April until March of the following calendar year),  
32  
33 106 discharge status (alive or deceased) and the presence of a co-diagnosis of liver diseases  
34  
35 107 (ICD-10 codes K70-K77, R18) including hepatic carcinoma (ICD-10 code C22). CHC  
36  
37 108 associated hospitalizations were identified by the ICD-10 code B18.2.  
38  
39  
40  
41

42 109 Population denominators for rate calculations were obtained from Statistics Canada  
43  
44 110 population projections, medium growth scenario M1[16].  
45  
46  
47

48 111 Analysis:  
49

50  
51 112 As a general outline, trends in the number of hospitalizations were estimated by birth  
52  
53 113 cohort, and then these trends were used to predict the future burden in the younger birth  
54  
55 114 cohorts as they aged. Next rates and rate ratios with the 1970-74 cohort as a reference  
56  
57  
58  
59  
60

1  
2  
3  
4  
5  
6  
7 115 were calculated three different measures of the cohort effect: by year of hospitalization; at  
8  
9 116 the same age; and future lifetime. Current year and near-term predictions focus on the  
10  
11 117 visible burden. With new more effective treatments on the horizon, reducing the near-term  
12  
13 118 burden is a more urgent concern. The same age comparison is a proxy measure of the  
14  
15 119 relative prevalence. The future lifetime comparison is similar to the comparison used in  
16  
17 120 cost-effectiveness analysis.

21  
22 121 The first step was to estimate the trend in the number of CHC-LD associated  
23  
24 122 hospitalizations for each 5-year birth cohort from 1915-19 to 1980-84. A generalized  
25  
26 123 linear model (GLM) with a log link, Poisson distribution and dispersion parameter  
27  
28 124 specified[17] was fit to the annual number of hospitalizations stratified by birth cohort with  
29  
30 125 year of discharge (batch year) and a constant term as the model covariates. The quasi-  
31  
32 126 Poisson regression model equation to predict the annual number of hospitalizations  
33  
34 127 ( $Hosp_{i,j}$ ) for birth cohort  $j$  ( $j=1915-19$  to 1980-84) in batch year  $i$  ( $i=2004$  to 2010) is  
35  
36 128 given by:

$$37 \log(Hosp_{i,j}) = \beta_{2,j}Year_i + \beta_{1,j} \quad (1)$$

41  
42  
43  
44  
45 130 The estimated trend parameter value ( $\beta_{2,j}$ ) and its standard error were converted to an  
46  
47 131 average annual percentage change ( $e^{\beta_{2,j}} - 1$ ) for each birth cohort. The same model was  
48  
49 132 used to estimate the overall trend.

50  
51  
52  
53 133 The second step was to use a parametric bootstrap approach, which involves generating  
54  
55 134 simulated values of the parameters, to facilitate the calculation of confidence intervals (CI)

1  
2  
3  
4  
5  
6  
7 135 for the projected rate ratios. The bootstrap is a computationally intensive statistical  
8  
9 136 technique that allows the researcher to make inferences from data with complex  
10  
11 137 distributions (in this case, the ratios of projected rates)[17-19]. Random values were  
12  
13 138 generated using the normal distribution with the mean and standard deviation given by the  
14  
15 139 trend ( $\beta_{2,j}$ ) and standard error estimated in the quasi-Poisson regression model in the first  
16  
17 140 step. The number of hospitalizations for each birth cohort in the last year of available data  
18  
19 141 ( $Hosp_{2010,j}$ ) was also simulated from the distribution of uncertainty (standard error)  
20  
21 142 associated with model predicted value for 2010. In the third step, the average age at  
22  
23 143 hospitalization over the study period was calculated for each birth cohort and the  
24  
25 144 simulated values for the cohort-specific trends ( $\beta_{2,j}$ ) were interpolated linearly to obtain  
26  
27 145 trend estimates for each single year of age[17]. The fourth step was to project the number  
28  
29 146 of hospitalizations until age 90 for each 5-year birth cohort and then sum the predicted  
30  
31 147 number of hospitalizations for the time period of interest (for example, next 10 years, at  
32  
33 148 age 75, or future lifetime) and calculate hospitalization rates. Future lifetime  
34  
35 149 hospitalizations were calculated by summing the projected values from 2011 until age 90  
36  
37 150 and rates were calculated by dividing by the population in 2010. The 1970-74 birth cohort  
38  
39 151 was selected as the reference for the rate ratios. Same-age rate ratios were reported for age  
40  
41 152 75, though with the methodology used same-age rate ratios would not be sensitive to this  
42  
43 153 choice of age. The final step was to calculate the mean and standard deviation of the rate  
44  
45 154 ratios from the previous step. Results from steps 1 (trends), 4(projections) and 5 (rate  
46  
47 155 ratios) are reported. SAS Enterprise Guide 5.1 [17] was used for the analysis.  
48  
49  
50  
51  
52  
53  
54  
55  
56  
57  
58  
59  
60

1  
2  
3  
4  
5  
6  
7 **157 Results**  
8  
9

10  
11 158 The number of CHC-associated hospitalizations in the study area increased approximately  
12  
13 159 5% per year from 4700 in 2004/05 to 6400 in 2010/11. The rate of increase was more  
14  
15 160 pronounced for CHC-LD associated hospitalizations at 6.0% (95% CI, 4.4%-7.7%) per  
16  
17 161 year. The proportion of CHC-LD associated hospitalizations increased with increasing age  
18  
19 162 from 5% for patients less than 30 years of age, reaching 60% by age 65. The fatality rate  
20  
21 163 also increased with increasing age from 10% of CHC-LD associated hospitalizations for  
22  
23 164 patients under the age of 30 years to 18% by age 65. The 'baby boom' cohort accounted  
24  
25 165 for 75% of all CHC-LD associated hospitalizations in 2010, though by 2010 the number of  
26  
27 166 CHC-LD associated hospitalizations among the 1965-69 birth cohort had already increased  
28  
29 167 to levels seen 5 years earlier in the 1960-64 birth cohort (Figure 1).  
30  
31  
32  
33  
34

35 168 Trends:  
36  
37

38 169 Statistically significant increases in the number of CHC-LD associated hospitalizations  
39  
40 170 over the study period were detected for birth cohorts from 1950-54 to 1975-79,  
41  
42 171 corresponding to an approximate age range of 25 to 60 years and statistically significant  
43  
44 172 declines were detected for the 1920-24 and 1925-29 birth cohorts (Table 1). The rate of  
45  
46 173 increase was highest at approximately 30 years of age (Table 1 and Figure 2).  
47  
48  
49

50 174 Projections:  
51  
52

53 175 Applying these estimated trends to the historic hospitalization data produced a status quo  
54  
55 176 projection which suggests that the 1950-54 and 1955-59 birth cohorts will continue to  
56  
57  
58  
59  
60

1  
2  
3  
4  
5  
6  
7 177 experience the highest annual number of CHC-LD associated hospitalizations well past  
8  
9 178 2020 (Table 2, Figure 3a). The number of annual hospitalizations is projected to peak  
10  
11 179 around age 70 to 80 (Table 1, Figure 3b). The 6.0% (95%CI, 4.1%-7.9%) annual increase  
12  
13 180 observed over the study period for all 5-year birth cohorts (1915-1984) combined is  
14  
15  
16 181 projected to decline to 3% per year by 2020 and eventually plateau approximately 10 years  
17  
18 182 later.

19  
20  
21  
22 183 Ratio Ratios:

23  
24  
25 184 Over the next 10 years, the morbidity rate for the 1950-54 and 1955-59 cohorts is predicted  
26  
27 185 to remain high at approximately 10.7 (95% CI, 6.7 -14.7) and 9.1 (95% CI, 5.8 – 12.4)  
28  
29 186 times the rate for persons born between 1970 and 1974 respectively in 2020 (Table 2). The  
30  
31 187 estimated rate ratios at age 75 can be considered a proxy for the relative prevalence of  
32  
33 188 CHC in different cohorts, since age effects have been controlled for. The same-age ratios  
34  
35 189 suggest that the CHC prevalence is approximately 3.6 (95% CI, 2.3 – 4.9) times higher for  
36  
37 190 the 1950-54 birth cohort compared to the 1970-74 cohort, while the estimated ratio for the  
38  
39 191 future lifetime morbidity burden is slightly lower at 2.4 (95% CI, 1.5 – 3.4). Though the  
40  
41 192 disease burden for both 1960s birth cohorts is currently lower than for the two 1950s birth  
42  
43 193 cohorts, the future lifetime burden is predicted to be similar for all four birth cohorts. It is  
44  
45 194 uncertain whether the decline in prevalence seen in successive 5-year birth cohorts from  
46  
47 195 1955-59 to 1970-74 will continue with younger cohorts, though the future lifetime burden  
48  
49 196 for persons born after 1970 is possibly elevated compared to persons born before 1944  
50  
51  
52  
53  
54  
55  
56  
57  
58  
59  
60

1  
2  
3  
4  
5  
6  
7 197 (Tables 2). Table 3 provides summary classification of the relative disease burden by birth

8  
9 198 cohort.

10  
11  
12  
13 199  
14  
15  
16  
17  
18  
19  
20  
21  
22  
23  
24  
25  
26  
27  
28  
29  
30  
31  
32  
33  
34  
35  
36  
37  
38  
39  
40  
41  
42  
43  
44  
45  
46  
47  
48  
49  
50  
51  
52  
53  
54  
55  
56  
57  
58  
59  
60

Confidential

## 200 **Interpretation**

201 The disease burden associated with CHC is significantly elevated for the 1950-54 and  
202 1955-59 birth cohorts. Without further interventions, CHC-LD hospitalizations for these  
203 cohorts are expected to continue increasing before peaking at approximately 1.5 times the  
204 2010 rate around 2025 to 2030. Despite the apparent lower prevalence of CHC among  
205 persons born in the 1960s, the potential to reduce the disease burden over a longer life span  
206 in younger cohorts suggests that the 60s cohorts could also benefit from earlier detection  
207 and treatment to stop disease progression. It is too early to fully assess the relative CHC  
208 prevalence and disease burden for persons born after 1974, though this analysis suggests  
209 continued monitoring of these younger birth cohorts would be appropriate. Both age and  
210 year of birth as a proxy for exposure contribute to the level of severe disease.

211 The rate of increase in CHC- and CHC-LD-associated admissions over the study period is  
212 considerably less than earlier estimates of 15% to 30% annual increases[6, 20]. The higher  
213 trends of the earlier studies can be explained in part by the combined effects of aging and  
214 differences in prevalence by birth cohort. In contrast to the increase in the disease burden,  
215 the number of new HCV diagnoses have been declining in recent years for most birth  
216 cohorts over the age of 30[21, 22]. Though the natural history of an infection with HCV is  
217 difficult to study and disease progression rates vary depending on the cohorts studied[11-  
218 13, 23], estimates of the rate of increase in disease burden by age alone are emerging.  
219 Zalesak and colleagues[24], in examining a Medicare claims database from the US, found  
220 that CHC patient populations have already started to decline for persons born before 1945



1  
2  
3  
4  
5  
6  
7 221 (aged 65+ in 2010). Our age-specific estimates of the rate of increase in patient  
8  
9 222 populations followed by birth cohort are in close agreement, though we do not detect a  
10  
11 223 statistically significant decline in the number of CHC-LD associated hospitalizations  
12  
13  
14 224 except for persons born before 1925.

15  
16  
17 225 Estimates from an American household survey found that persons born in the 1950s had  
18  
19 226 the highest anti-HCV prevalence at 4.3 times that of persons born in the 1970s[2], whereas,  
20  
21  
22 227 we predict a CHC-LD burden for Canadians born in the 1950s of 3.5 times that for  
23  
24 228 Canadians born between 1970 and 1974. The Canadian anti-HCV prevalence estimates  
25  
26 229 from recent household surveys are however lower than the American estimate by a factor  
27  
28  
29 230 of 3 (0.5% versus 1.6%)[2, 5]. Our estimates of relative prevalence, combined with the  
30  
31 231 CHMS estimate[5], suggest an anti-HCV Canadian household prevalence of approximately  
32  
33 232 1.1% for persons born in the 1950s and 0.5% and 0.3% for Canadians born in 1945-49 and  
34  
35  
36 233 the 1970s respectively. Household prevalence is, however, considered an underestimate  
37  
38 234 of the national prevalence as groups such as the homeless and inmates are at high risk for  
39  
40  
41 235 HCV and were not included in the household surveys.

42  
43  
44 236 Limitations:

45  
46  
47 237 The primary limitation of this study is that to project the future disease burden, we  
48  
49 238 assumed that the main driver of the birth-cohort specific trends in the annual number of  
50  
51 239 CHC-LD associated hospitalizations was age combined with time since infection. As time  
52  
53 240 since infection was not observed, it could be an important confounder. The relationship  
54  
55  
56 241 between age and time since infection is expected to be consistent across younger birth  
57  
58  
59  
60

1  
2  
3  
4  
5  
6  
7 242 cohorts for whom injection drug use is considered the primary risk factor for HCV  
8  
9 243 infections. However, this may not be the case for older birth cohorts for whom blood  
10  
11 244 transfusion, blood products, or organ transplant before 1992 are recognized sources of  
12  
13 245 infection in Canada[4]. Later age at acquisition has been associated with a higher  
14  
15  
16 246 prevalence of cirrhosis 20 years later and faster rates of progression to cirrhosis[12, 25].  
17  
18 247 The source of the HCV infection is also known to influence the all-cause mortality  
19  
20  
21 248 rate[10]. As a result, the disease burden for persons born after 1950 may peak somewhat  
22  
23 249 earlier and decline faster than suggested in Figure 3. Although improvement in treatment  
24  
25 250 options over the study period have likely influenced the historic trends, significant future  
26  
27  
28 251 improvements in treatment options or the development of drug resistance could  
29  
30 252 significantly alter the future disease burden and rate ratios. These sources of additional  
31  
32  
33 253 uncertainty were not included in the estimated confidence intervals for the rate ratios.  
34  
35

36 254 Conclusions:

37  
38  
39 255 In summary, this analysis has demonstrated an increasing burden of CHC-LD associated  
40  
41 256 hospitalizations from 2004 to 2010. It is clear that without additional interventions, the  
42  
43 257 disease burden of the 1950-54 and 1955-59 birth cohorts is especially high and will  
44  
45  
46 258 continue to be noticeably elevated over many years. The potential to reduce the disease  
47  
48 259 burden over a longer life span in younger cohorts suggests that the potential benefits of  
49  
50  
51 260 earlier detection and treatment should be considered for younger birth cohorts as well.  
52  
53 261 Analysis of birth cohort-specific trends has provided additional insight into the emerging  
54  
55 262 disease burden due to CHC at the population level.  
56  
57  
58  
59  
60

1  
2  
3  
4  
5  
6  
7 **263 Acknowledgements**  
8  
9

10 264 The authors acknowledge the support of the Canadian Institute of Health Information and  
11  
12 265 all those involved in the collection and compilation of the Discharge Abstract Database.  
13  
14

15 266 As well, the authors wish to thank the Data Coordination and Access Program of the Public  
16  
17 267 Health Agency of Canada for providing access to this database. The cooperation of all  
18  
19 268 involved in these activities is gratefully acknowledged.  
20  
21

22  
23 269  
24  
25  
26  
27  
28  
29  
30  
31  
32  
33  
34  
35  
36  
37  
38  
39  
40  
41  
42  
43  
44  
45  
46  
47  
48  
49  
50  
51  
52  
53  
54  
55  
56  
57  
58  
59  
60

Confidential

1  
2  
3  
4  
5  
6  
7  
8  
9  
10  
11  
12  
13  
14  
15  
16  
17  
18  
19  
20  
21  
22  
23  
24  
25  
26  
27  
28  
29  
30  
31  
32  
33  
34  
35  
36  
37  
38  
39  
40  
41  
42  
43  
44  
45  
46  
47  
48  
49  
50  
51  
52  
53  
54  
55  
56  
57  
58  
59  
60

270 **Notes**

271 Financial support

272 Third party funding was not sought. LML is supported by a Research Chair from the  
273 Manitoba Health Research Council.

274 Potential conflicts of interest

275 None declared.

276 Author contributions

277 DLS performed the analysis and drafted the manuscript. All contributed to the concept and  
278 design of the study, to the interpretation and presentation of study results. All authors  
279 revised the manuscript critically and all approved the final version submitted for  
280 publication.

281

Confidential

282 **Tables:**

283 Table 1: Birth-cohort specific Average Annual Percentage Change in the Number of CHC-  
 284 LD associated Hospitalizations from 2004/05 to 2010/11<sup>1</sup>  
 285

| Birth Cohort                        | Average Age | Rate in 2010 (100,000) (95% CI) | Average Annual %Change | 95% CI        | p-value | Stat Sig. |
|-------------------------------------|-------------|---------------------------------|------------------------|---------------|---------|-----------|
| 1915 - 1919                         | 89          | 8.9 (4.8, 16.6)                 | -6.8%                  | (-20.9, 9.4)  | 0.3902  |           |
| 1920 - 1924                         | 83          | 6.7 (4.5, 10.1)                 | -13.9%                 | (-22.0, -5.1) | 0.0028  | *         |
| 1925 - 1929                         | 79          | 12.4 (9.8, 15.8)                | -6.6%                  | (-12.3, -0.6) | 0.0314  | *         |
| 1930 - 1934                         | 74          | 17.1 (14.2, 20.6)               | 3.5%                   | (-1.9, 9.1)   | 0.2095  |           |
| 1935 - 1939                         | 69          | 14.9 (12.5, 17.8)               | 1.1%                   | (-3.9, 6.2)   | 0.6786  |           |
| 1940 - 1944                         | 64          | 16.4 (14.1, 19.1)               | 1.6%                   | (-2.6, 5.9)   | 0.4715  |           |
| 1945 - 1949                         | 59          | 24.4 (21.9, 27.1)               | 2.2%                   | (-0.8, 5.3)   | 0.1594  |           |
| 1950 - 1954                         | 54          | 48.2 (45.0, 51.8)               | 6.6%                   | (4.4, 8.9)    | <.0001  | *         |
| 1955 - 1959                         | 50          | 36.5 (33.9, 39.4)               | 8.9%                   | (6.5, 11.4)   | <.0001  | *         |
| 1960 - 1964                         | 45          | 15.8 (14.2, 17.7)               | 11.5%                  | (7.7, 15.4)   | <.0001  | *         |
| 1965 - 1969                         | 40          | 9.1 (7.8, 10.6)                 | 12.7%                  | (7.4, 18.4)   | <.0001  | *         |
| 1970 - 1974                         | 35          | 2.6 (1.9, 3.5)                  | 10.1%                  | (0.7, 20.6)   | 0.0361  | *         |
| 1975 - 1979                         | 30          | 1.6 (1.0, 2.4)                  | 33.6%                  | (14.3, 57.8)  | 0.0004  | *         |
| 1980 - 1984                         | 25          | 0.4 (0.2, 0.9)                  | 25.0%                  | (-5.1, 69.3)  | 0.1244  |           |
| <b>All Birth Cohorts: 1915-1984</b> | 55          | 8.9 (4.8, 16.6)                 | 6.0%                   | (4.1, 7.9)    | <.0001  | *         |

286 Notes:

287 <sup>1</sup> Results from regression model

288

1  
2  
3  
4  
5  
6  
7  
8  
9  
10  
11  
12  
13  
14  
15  
16  
17  
18  
19  
20  
21  
22  
23  
24  
25  
26  
27  
28  
29  
30  
31  
32  
33  
34  
35  
36  
37  
38  
39  
40  
41  
42  
43  
44  
45  
46  
47  
48  
49

289 Table 2: Average Projected Ratios of Hospitalizations Rates Associated with CHC-LD with 95% Confidence Intervals

| Birth Cohort            | 2010 (last year of Data) | 2011 (1 year projection) | 5 years <sup>1</sup> | 2015             | 10 years <sup>1</sup> | 2020            | At age 75      | Until Age 90 <sup>1</sup> |
|-------------------------|--------------------------|--------------------------|----------------------|------------------|-----------------------|-----------------|----------------|---------------------------|
| 1915 - 1919             | 2.9 (1.4, 6.1)           | 2.7 (0.9, 4.5)           |                      |                  |                       |                 |                |                           |
| 1920 - 1924             | 2.4 (1.4, 4.1)           | 2.1 (1.5, 2.8)           | 1.6 (0.5, 2.7)       | 1.2 (<2.3)       |                       |                 |                |                           |
| 1925 - 1929             | 4.4 (3.0, 6.4)           | 3.7 (2.3, 5.2)           | 2.4 (1.3, 3.6)       | 1.6 (0.6, 2.7)   | 1.6 (0.5, 2.6)        | 0.8 (<2.1)      |                |                           |
| 1930 - 1934             | 7.0 (5.0, 9.7)           | 6.1 (3.8, 8.3)           | 3.5 (2.0, 5.0)       | 2.2 (1.0, 3.4)   | 2.0 (1.0, 3.0)        | 0.8 (0.2, 1.4)  |                | 0.2 (0.1, 0.3)            |
| 1935 - 1939             | 4.7 (3.4, 6.6)           | 5.8 (3.4, 8.2)           | 4.1 (2.6, 5.7)       | 3.1 (1.8, 4.5)   | 2.6 (1.5, 3.7)        | 1.1 (0.4, 1.8)  | 0.8 (0.4, 1.2) | 0.3 (0.1, 0.4)            |
| 1940 - 1944             | 6.3 (4.6, 8.6)           | 6.0 (4.3, 7.8)           | 4.7 (3.0, 6.4)       | 3.9 (2.3, 5.6)   | 3.5 (2.1, 5.0)        | 2.3 (1.1, 3.4)  | 1.0 (0.5, 1.5) | 0.5 (0.2, 0.7)            |
| 1945 - 1949             | 8.8 (6.5, 11.8)          | 9.3 (6.2, 12.4)          | 6.9 (4.5, 9.4)       | 5.7 (3.5, 8.0)   | 5.3 (3.2, 7.4)        | 3.8 (2.0, 5.6)  | 1.6 (0.9, 2.3) | 0.9 (0.5, 1.4)            |
| 1950 - 1954             | 17.6 (13.2, 23.5)        | 17.8 (10.9, 24.7)        | 14.0 (9.3, 18.6)     | 11.7 (7.3, 16.0) | 10.7 (6.7, 14.7)      | 7.5 (4.0, 10.9) | 3.6 (2.3, 4.9) | 2.4 (1.5, 3.4)            |
| 1955 - 1959             | 13.7 (10.3, 18.2)        | 13.9 (9.7, 18.1)         | 11.5 (7.7, 15.3)     | 10.0 (6.3, 13.6) | 9.1 (5.8, 12.4)       | 6.6 (3.7, 9.4)  | 3.4 (2.1, 4.7) | 2.6 (1.6, 3.6)            |
| 1960 - 1964             | 5.6 (4.2, 7.6)           | 6.2 (4.5, 7.9)           | 5.6 (3.7, 7.5)       | 5.2 (3.2, 7.1)   | 4.8 (3.0, 6.6)        | 3.8 (2.2, 5.5)  | 2.2 (1.4, 3.1) | 1.9 (1.2, 2.6)            |
| 1965 - 1969             | 3.4 (2.5, 4.7)           | 3.7 (2.5, 5.0)           | 3.4 (2.2, 4.6)       | 3.3 (2.1, 4.6)   | 3.2 (2.0, 4.4)        | 3.0 (1.8, 4.1)  | 2.1 (1.3, 2.8) | 1.9 (1.2, 2.6)            |
| 1970 - 1974 (Reference) |                          |                          |                      |                  |                       |                 |                |                           |
| 1975 - 1979             | 0.7 (0.4, 1.0)           | 0.7 (0.4, 1.0)           | 0.6 (0.3, 1.0)       | 0.6 (0.2, 1.0)   | 0.6 (0.2, 1.0)        | 0.6 (0.2, 1.1)  | 1.1 (0.4, 1.8) | 1.1 (0.4, 1.8)            |
| 1980 - 1984             | 0.1 (0.1, 0.3)           | 0.1 (<0.3)               | 0.3 (<0.6)           | 0.3 (<0.8)       | 0.3 (<0.7)            | 0.3 (<0.8)      | 0.7 (< 1.5)    | 1.0 (<2.5)                |

290  
291 Notes:  
292 <sup>1</sup> From 2011

1  
2  
3  
4  
5  
6  
7  
8  
9  
10  
11  
12  
13  
14  
15  
16  
17  
18  
19  
20  
21  
22  
23  
24  
25  
26  
27  
28  
29  
30  
31  
32  
33  
34  
35  
36  
37  
38  
39  
40  
41  
42  
43  
44  
45  
46  
47  
48  
49  
50  
51  
52  
53  
54  
55  
56  
57  
58  
59  
60

293 Table 3: Classification of Disease Burden by Birth Cohorts

| <b>Relative Burden</b> | <b>Next 10 years</b> | <b>Lifetime</b>  |
|------------------------|----------------------|------------------|
| High                   | 1950-59              | 1950-69          |
| Medium High            | 1960-69              |                  |
| Medium                 | 1945-49, 1970-84     | 1945-49, 1970-84 |
| Low                    | 1925-44              | 1925-44          |

294  
295

Confidential

1  
2  
3  
4  
5  
6  
7 296 **Figure Legends:**  
8  
9

10 297 Figure 1: Annual chronic hepatitis C and liver disease associated hospitalizations by 5-year  
11  
12 298 birth cohort, DAD participating hospitals (Canada, excluding the province of  
13  
14 299 Quebec). Each data point corresponds to the annual number of hospitalizations with a  
15  
16 300 contributing diagnosis of CHC and liver disease for the 5-year birth cohort identified  
17  
18 301 in the legend (by batch year running from April to March). Data points are plotted  
19  
20 302 against the average age at time of admission for the 5-year birth cohort on the x-axis.  
21  
22 303 Data points corresponding to the same birth cohort have been joined. Each time  
23  
24 304 series corresponds to years 2004/05-2010/11. The first data point in a time-series  
25  
26 305 corresponds to the batch year of 2004/05. For successive birth cohorts, there is an  
27  
28 306 overlap of two data points with the same age. The vertical space between the cohort-  
29  
30 307 specific series at the same age is an indication of a cohort effect due to different  
31  
32 308 levels of exposure to HCV as well as differences in the availability of treatments.  
33  
34  
35  
36  
37  
38

39 309 Figure 2: Rate of change in the number of chronic hepatitis C and liver disease associated  
40  
41 310 hospitalizations, estimated by 5-year birth cohort and plotted by the average age of  
42  
43 311 the cohort. The 95% confidence intervals are indicated by the vertical bars and were  
44  
45 312 calculated by the regression model. The age indicated on the x-axis corresponds to  
46  
47 313 the average age for the birth-cohort over the study period. (See Table 1)  
48  
49  
50

51  
52 314 Figure 3: Status quo projection of the number of chronic hepatitis C and liver disease  
53  
54 315 associated hospitalizations. This is one of the simulated projections that illustrates  
55  
56 316 the underlying cohort structure. In the calculations of rate ratios, the 1970-74 birth  
57  
58  
59  
60



1  
2  
3  
4  
5  
6  
7 317 cohort was used as the reference (dotted brown line). a) Projections are plotted  
8  
9 318 against calendar year on the x-axis. For near term measures of disease burden, rate  
10  
11 319 ratios were calculated for: the last year of data (2010); 1 year projection (2011); over  
12  
13 320 the next 5 years (2011-2015); in 5 years (2015); over the next 10 years (2011-2020);  
14  
15 321 and in 10 years (2020). b) Projections are plotted against the average age of the birth  
16  
17 322 cohort on the x-axis. Rate ratios calculated for the same age (age 75 was used in the  
18  
19 323 text) provide a measure of relative exposures closely related to the relative CHC  
20  
21 324 prevalence. Future lifetime hospitalizations were calculated as the area under the  
22  
23 325 curve from 2011 to age 90.  
24  
25  
26  
27  
28  
29 326  
30  
31  
32  
33  
34  
35  
36  
37  
38  
39  
40  
41  
42  
43  
44  
45  
46  
47  
48  
49  
50  
51  
52  
53  
54  
55  
56  
57  
58  
59  
60

## References

1. Smith BD, Morgan RL, Beckett GA, et al. Recommendations for the identification of chronic hepatitis C virus infection among persons born during 1945-1965. *MMWR Recomm Rep* 2012;61:1-32.
2. Armstrong GL, Wasley A, Simard EP, et al. The Prevalence of Hepatitis C Virus Infection in the United States, 1999 through 2002. *Ann Intern Med* 2006;144:705-14.
3. Denniston MM, Klevens RM, McQuillan GM, et al. Awareness of infection, knowledge of hepatitis C, and medical follow-up among individuals testing positive for hepatitis C: National Health and Nutrition Examination Survey 2001-2008. *Hepatology* 2012;55:
4. Pinette G, Cox J, Heathcote J, et al. Primary Care Management of Chronic Hepatitis C: Professional Desk Reference 2009. Public Health Agency of Canada: Available: <http://www.catie.ca/sites/default/files/Primary-Care-Management-of-Chronic-Hepatitis-C-Professional-Desk-Reference.pdf> (accessed 24Oct2013).
5. Rotermann M, Langlois K, Andonov A, et al. Seroprevalence of hepatitis B and C virus infections: Results from the 2007 to 2009 and 2009 to 2011 Canadian Health Measures Survey. *Health Rep* 2013;24:3-13.
6. Myers RP, Liu M, Shaheen AA. The burden of hepatitis C virus infection is growing: a Canadian population-based study of hospitalizations from 1994 to 2004. *Can J Gastroenterol* 2008;22:381-7.
7. Canadian Vital Statistics - Death Database. Statistics Canada, Health Statistics Division: Ottawa; 2008.
8. Discharge Abstract Database. Canadian Institute for Health Information (CIHI): Ottawa; 1994-2010.
9. Kwong J, Ratnasingham S, Campitelli M, et al. The Impact of Infection on Population Health: Results of the Ontario Burden of Infectious Diseases Study. *PLoS ONE* 2012;7:e44103
10. Yu A, Spinelli JJ, Cook DA, et al. Mortality among British Columbians testing for hepatitis C antibody. *BMC Public Health* 2013;13:291.
11. Ascione A, Tartaglione MT, Giuseppe Di Costanzo G. Natural history of chronic

- 1  
2  
3  
4  
5  
6  
7 358 hepatitis C virus infection: HCV infection: a systemic disease Advances in  
8 359 pathophysiology, diagnosis and therapeutic approaches. *Digestive and Liver Disease*  
9 360 2007;39, Supplement 1:S4-S7.
- 10  
11  
12 361 12. Freeman AJ, Dore GJ, Law MG, et al. Estimating progression to cirrhosis in chronic  
13 362 hepatitis C virus infection. *Hepatology* 2001;34:809-16.
- 14  
15  
16 363 13. Dusheiko GM. The natural course of chronic hepatitis C: implications for clinical  
17 364 practice. *J Viral Hepat* 1998;5 Suppl 1:9-12.
- 18  
19  
20 365 14. World Health Organization (WHO). ICD-10: International Statistical Classification of  
21 366 Diseases and Related Health Problems, Tenth Revision. World Health  
22 367 Organization: Available: <http://apps.who.int/classifications/apps/icd/icd10online/>  
23 368 (accessed 2011 Jun 16).
- 24  
25  
26 369 15. Canadian Institute for Health Information (CIHI). Errata in Canadian Coding  
27 370 Standards for Version 2009 ICD-10-CA and CCI. Canadian Institute for Health  
28 371 Information (CIHI): Available: [http://www.cihi.ca/CIHI-ext-](http://www.cihi.ca/CIHI-ext-portal/internet/en/document/standards+and+data+submission/standards/classification+and+coding/bul_stand_01dec09)  
29 372 [portal/internet/en/document/standards+and+data+submission/standards/classification](http://www.cihi.ca/CIHI-ext-portal/internet/en/document/standards+and+data+submission/standards/classification+and+coding/bul_stand_01dec09)  
30 373 [+and+coding/bul\\_stand\\_01dec09](http://www.cihi.ca/CIHI-ext-portal/internet/en/document/standards+and+data+submission/standards/classification+and+coding/bul_stand_01dec09) (accessed 2013 May 16).
- 31  
32  
33 374 16. Statistics Canada. Table052-0005 - Projected population, by projection scenario, sex  
34 375 and age group as of July 1, Canada, provinces and territories, annual (persons),  
35 376 CANSIM (database). Demography Division: Available:  
36 377 [http://www5.statcan.gc.ca/cansim/pick-](http://www5.statcan.gc.ca/cansim/pick-choisir?lang=eng&id=520005&pattern=520005&searchTypeByValue=1&p2=42)  
37 378 [choisir?lang=eng&id=520005&pattern=520005&searchTypeByValue=1&p2=42](http://www5.statcan.gc.ca/cansim/pick-choisir?lang=eng&id=520005&pattern=520005&searchTypeByValue=1&p2=42)  
38 379 (accessed 2013 Nov 21).
- 39  
40  
41  
42 380 17. SAS Institute Inc. *SAS Enterprise Guide 5.1*, Cary, NC: SAS Institute Inc.; 2006.
- 43  
44  
45 381 18. Haukoos JS, Lewis RJ. Advanced Statistics: Bootstrapping Confidence Intervals for  
46 382 Statistics with Difficult Distributions. *Acad Emerg Med* 2008;12:360-5.
- 47  
48  
49 383 19. Henderson AR. The bootstrap: A technique for data-driven statistics. Using  
50 384 computer-intensive analyses to explore experimental data. *Clin Chim Acta*  
51 385 2005;359:1-26.
- 52  
53  
54 386 20. Grant WC, Jhaveri RR, McHutchison JG, et al. Trends in health care resource use for  
55 387 hepatitis C virus infection in the United States. *Hepatology* 2005;42:1406-13.
- 56  
57  
58 388 21. O'Brien SF, Fan W, Xi G, et al. Declining hepatitis C rates in first-time blood donors:

- 1  
2  
3  
4  
5  
6  
7 389 insight from surveillance and case-control risk factor studies. *Transfusion (Paris)*  
8 390 2008;48:902-9.  
9  
10  
11 391 22. Public Health Agency of Canada. Hepatitis C in Canada: 2005-2010 Surveillance  
12 392 Report. Centre for Communicable Disease and Infection Control, Infectious Disease  
13 393 Prevention and Control Branch, Public Health Agency of Canada, Ottawa, Canada.  
14 394 2011.  
15  
16  
17 395 23. Sweeting MJ, De Angelis D, Neal KR, et al. Estimated progression rates in three  
18 396 United Kingdom hepatitis C cohorts differed according to method of recruitment. *J*  
19 397 *Clin Epidemiol* 2006;59:144-52.  
20  
21  
22 398 24. Zalesak M, Francis K, Gedeon A, et al. Current and Future Disease Progression of  
23 399 the Chronic HCV Population in the United States. *PLoS ONE* 2013;8:e63959.  
24  
25  
26 400 25. Thein H-H, Yi Q, Dore GJ, et al. Estimation of stage-specific fibrosis progression  
27 401 rates in chronic hepatitis C virus infection: A meta-analysis and meta-regression.  
28 402 *Hepatology* 2008;48:418-31.  
29  
30  
31 403  
32  
33  
34  
35  
36  
37  
38  
39  
40  
41  
42  
43  
44  
45  
46  
47  
48  
49  
50  
51  
52  
53  
54  
55  
56  
57  
58  
59  
60

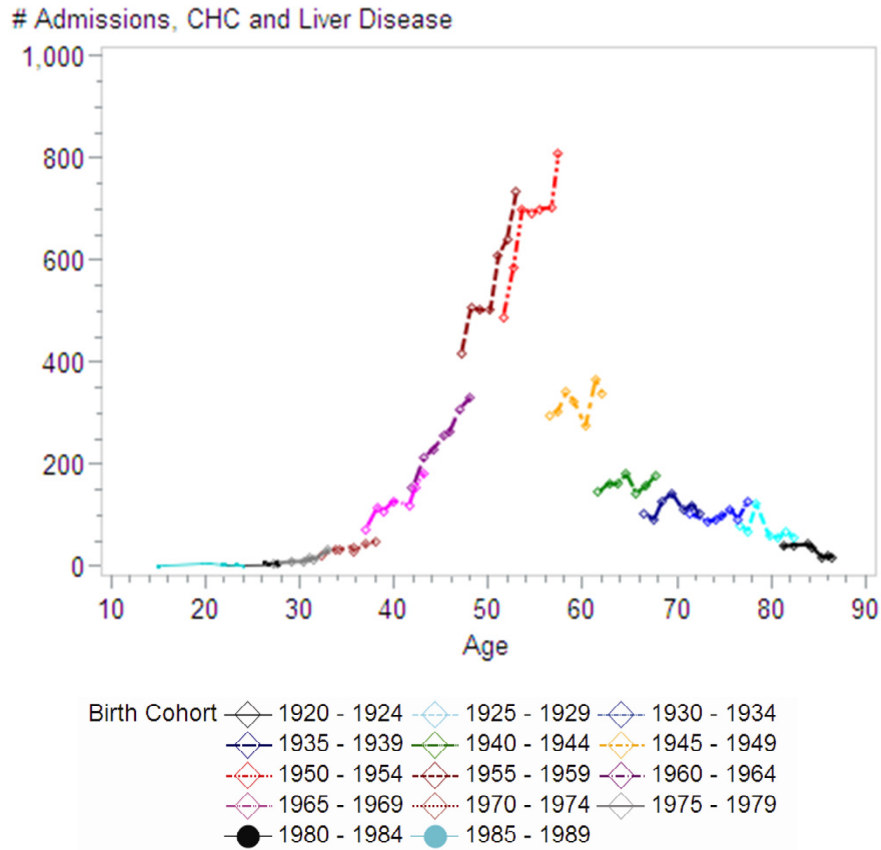

Figure 1

1  
2  
3  
4  
5  
6  
7  
8  
9  
10  
11  
12  
13  
14  
15  
16  
17  
18  
19  
20  
21  
22  
23  
24  
25  
26  
27  
28  
29  
30  
31  
32  
33  
34  
35  
36  
37  
38  
39  
40  
41  
42  
43  
44  
45  
46  
47  
48  
49

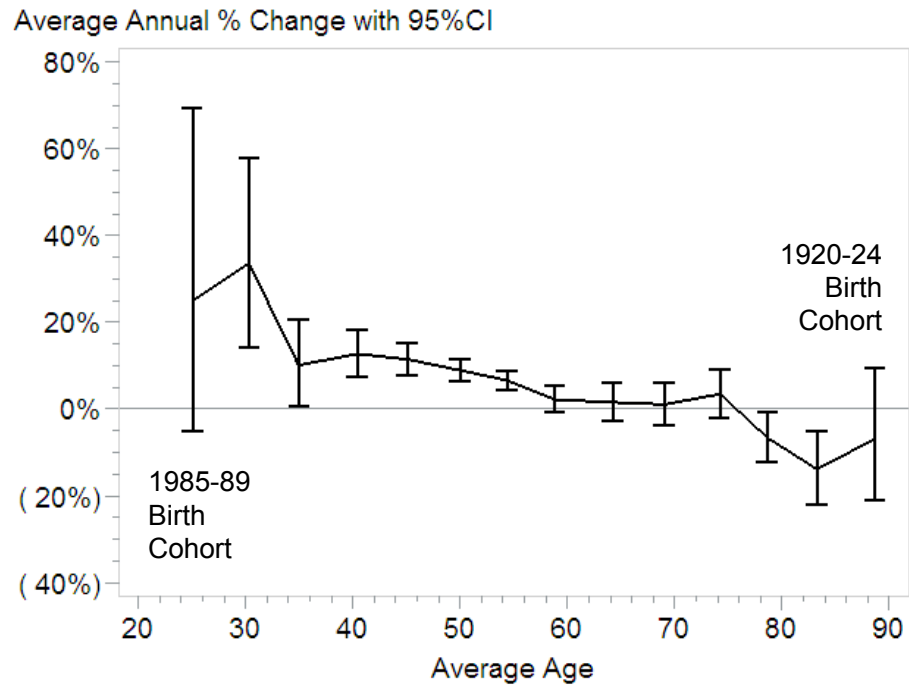

Figure 2

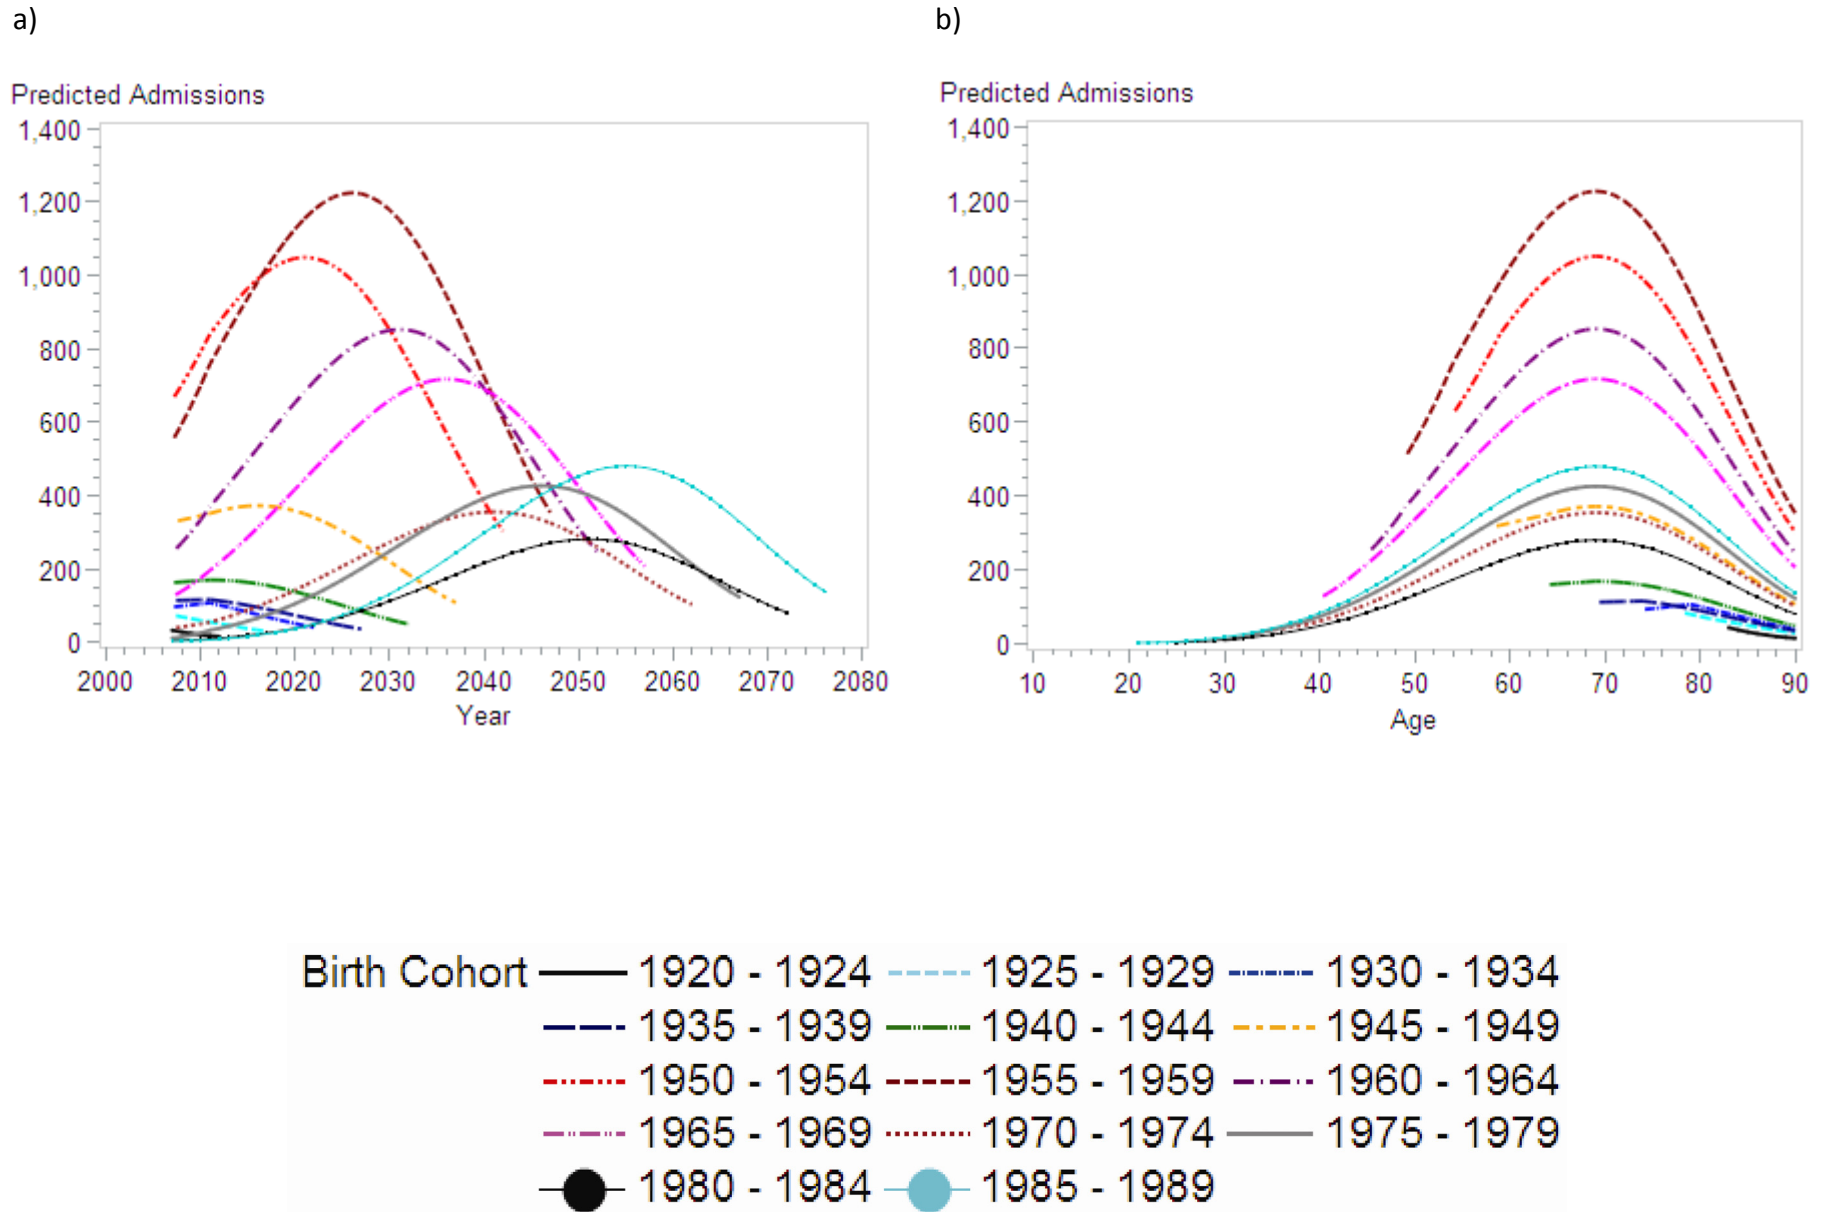

Figure 3
